# Supplementary material for: Fabrication of Highly Conductive Porous Fe3O4@RGO/PEDOT:PSS Composite Films via Acid Post-Treatment and Their Applications as Electrochemical Supercapacitor and Thermoelectric Material
Source: MDPI journal article supplement (doi:10.3390/polym15163453), 2023-08-18
Supplement: s1 [file s1]

Supporting Information

# Fabrication of Highly Conductive Porous $\text{Fe}_3\text{O}_4@\text{RGO}/\text{PEDOT:PSS}$ Composite Films via Acid Post-Treatment and Their Applications as Electrochemical Supercapacitor and Thermoelectric Material

Luyao Gao <sup>1,2,3</sup>, Fuwei Liu <sup>1,2,3,\*</sup>, Qinru Wei <sup>1</sup>, Zhiwei Cai <sup>1</sup>, Jiajia Duan <sup>1</sup>, Fuqun Li <sup>1</sup>, Huiying Li <sup>1</sup>, Ruotong Lv <sup>1</sup>, Mengke Wang <sup>1</sup>, Jingxian Li <sup>1</sup> and Letian Wang <sup>1</sup>

<sup>1</sup> College of Physics and Electronic Engineering, Xinyang Normal University, Xinyang 464000, China

<sup>2</sup> Key Laboratory of Advanced Micro/Nano Functional Materials of Henan Province, Xinyang Normal University, Xinyang 464000, China

<sup>3</sup> Energy-Saving Building Materials Innovative Collaboration Center of Henan Province, Xinyang Normal University, Xinyang 464000, China

\* Correspondence: liufuwei168@163.com

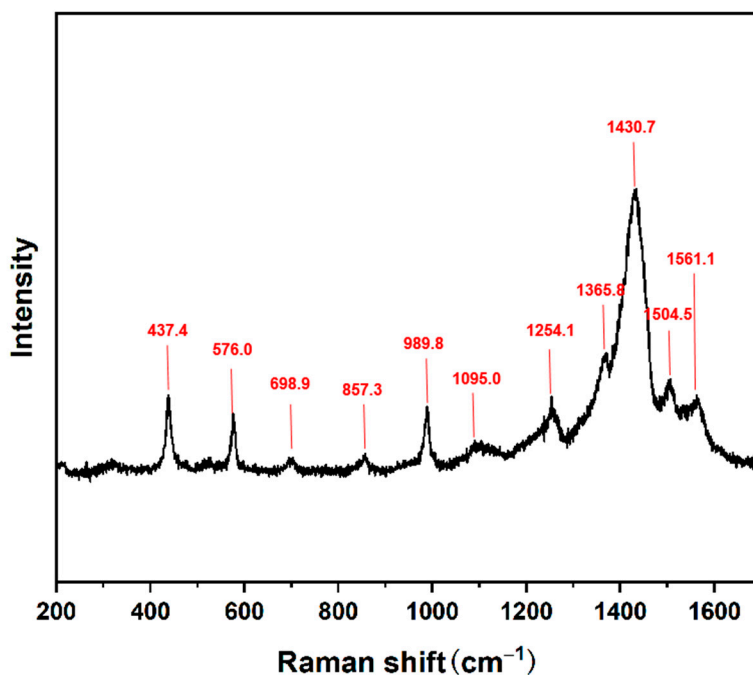

Figure S1. Raman spectra of the PEDOT:PSS film after acid treatment via  $\text{HClO}_4$ .

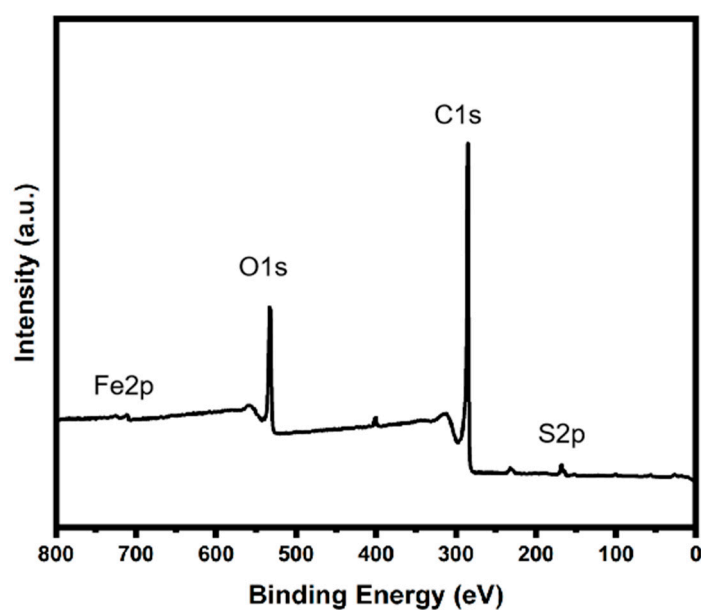

Figure S2. XPS survey spectrum of the porous  $\text{Fe}_3\text{O}_4\text{@RGO/PEDOT:PSS}$ .

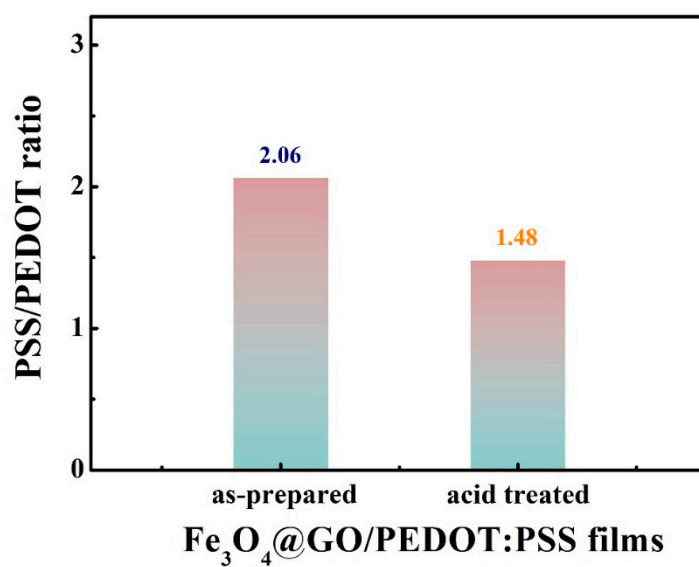

Figure S3. PSS/PEDOT ratio calculated for  $\text{Fe}_3\text{O}_4\text{@GO/PEDOT:PSS}$  samples before and  $\text{Fe}_3\text{O}_4\text{@RGO/PEDOT:PSS}$  after acid treatment.

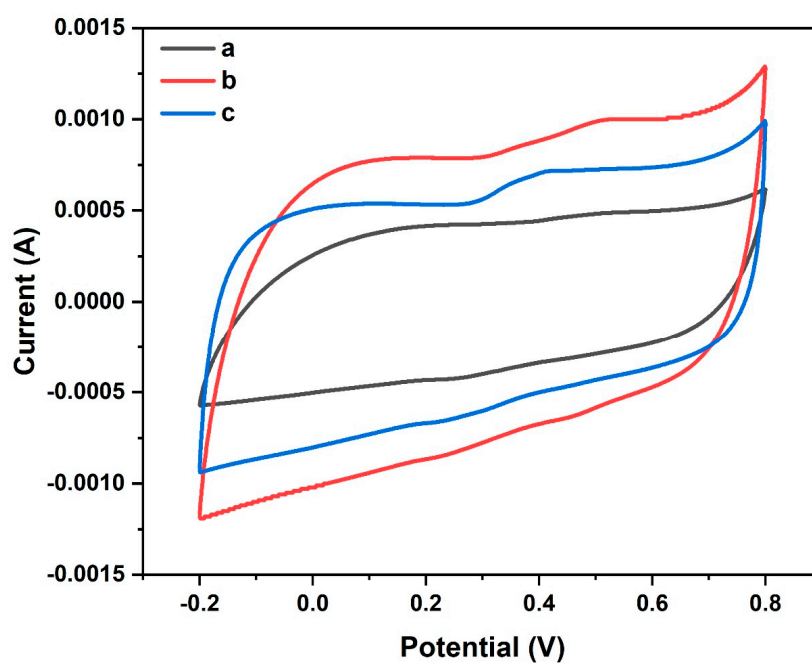

**Figure S4.** CV curves of  $\text{Fe}_3\text{O}_4@\text{RGO}/\text{PEDOT:PSS}$  with different PEDOT:PSS content at a scan rate of  $50 \text{ mV s}^{-1}$ : a, the content of PEDOT:PSS is 16.7 wt%; b, the content of PEDOT:PSS is 28.6 wt%; c, the content of PEDOT:PSS is 50.0 wt%.

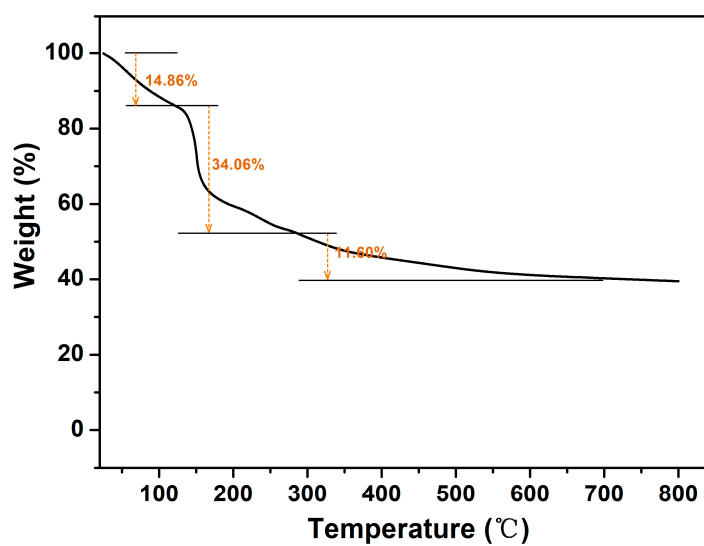

**Figure S5.** TG curves for  $\text{Fe}_3\text{O}_4@\text{RGO}/\text{PEDOT:PSS}$  flexible film.

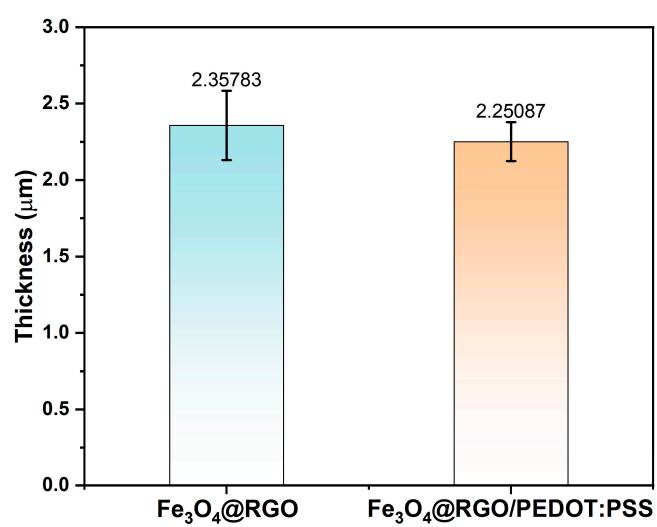

**Figure S6.** The thickness of Fe<sub>3</sub>O<sub>4</sub>@RGO and Fe<sub>3</sub>O<sub>4</sub>@RGO/PEDOT:PSS films.
